# Supplementary material
Source: PubMed Central journal article supplement (PMC133613)

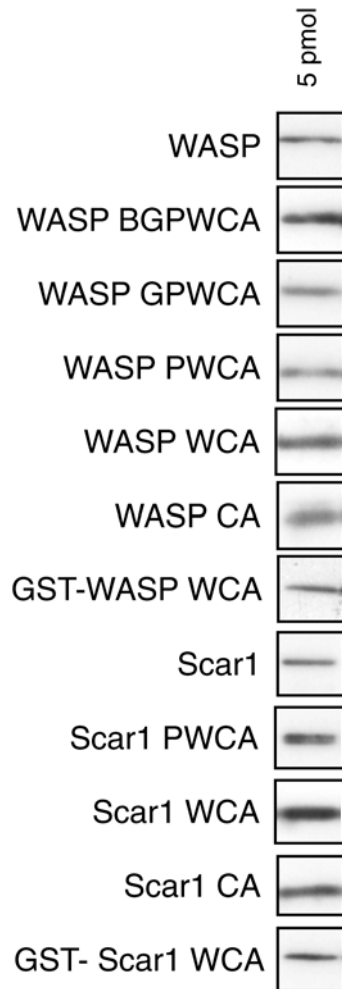

Supplement: mbc_13_11_4045__1.pdf [file mbc_13_11_4045__1.pdf]

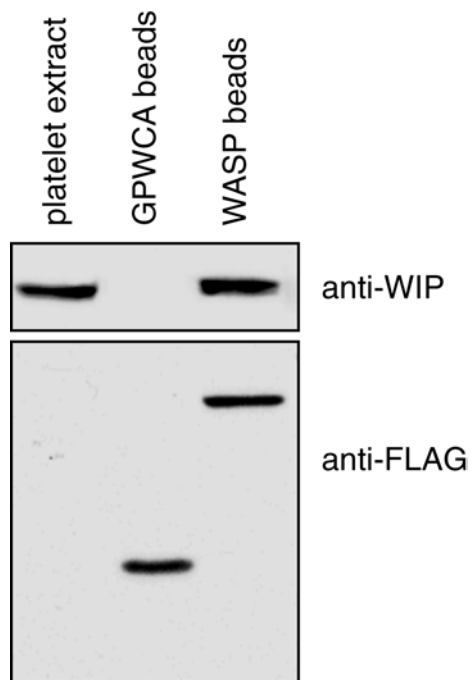

Supplement: mbc_13_11_4045__2.pdf [file mbc_13_11_4045__2.pdf]

**A**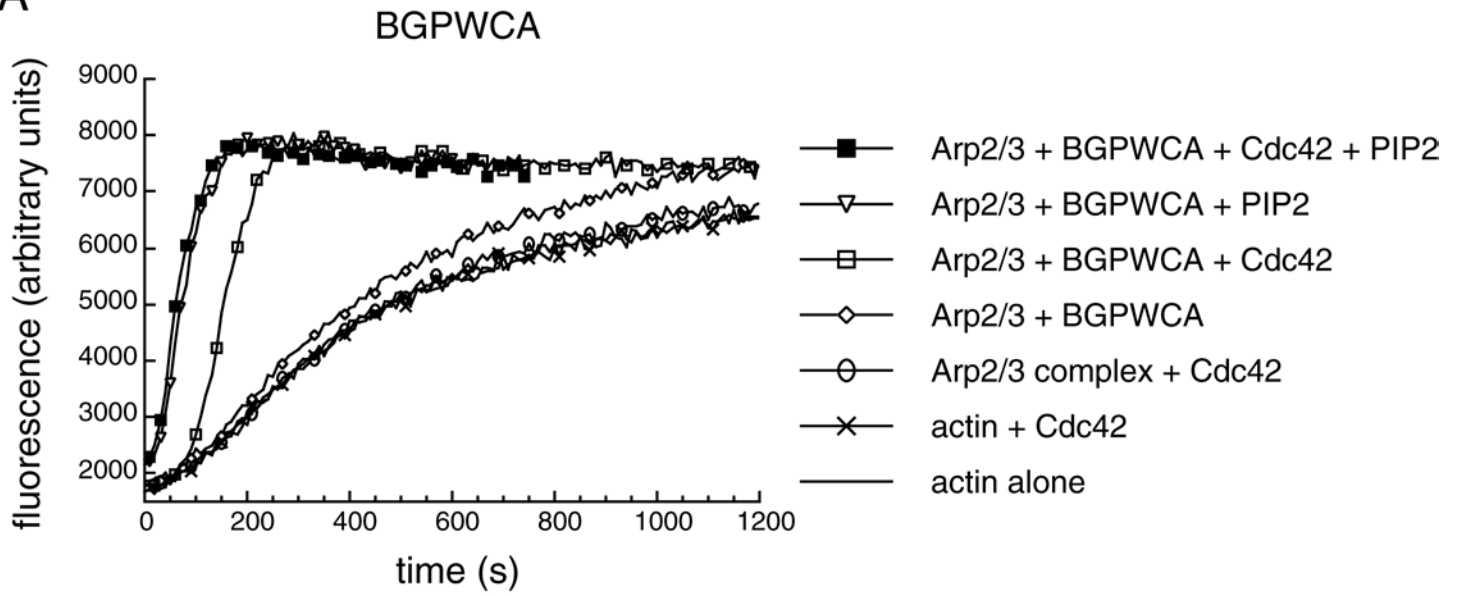**B**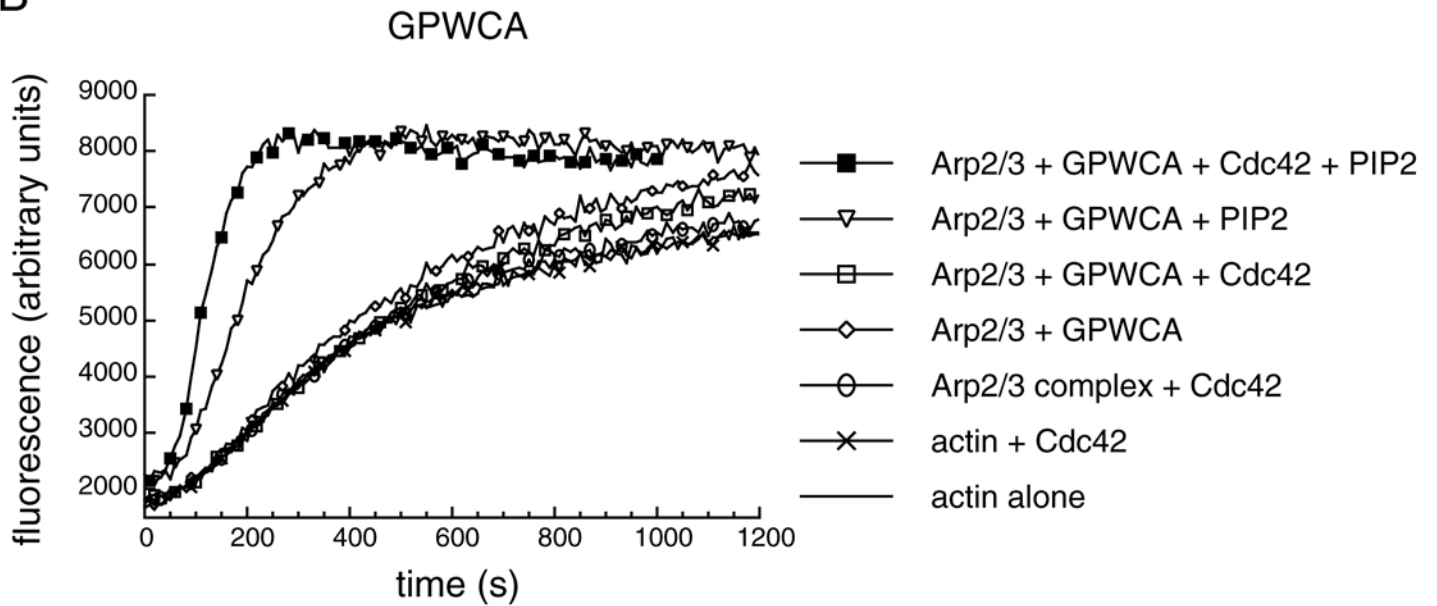

Supplement: mbc_13_11_4045__3.pdf [file mbc_13_11_4045__3.pdf]
